# Supplementary material for: Activated neutrophils polarize protumorigenic interleukin‐17A‐producing T helper subsets through TNF‐α‐B7‐H2‐dependent pathway in human gastric cancer
Source: PubMed Central journal article supplement (PMC8236123; doi:10.1002/ctm2.484), 2021-06-27
Supplement: CTM2-11-e484-s002.pdf [file CTM2-11-e484-s002.pdf]

1 Supplementary Figure 1.

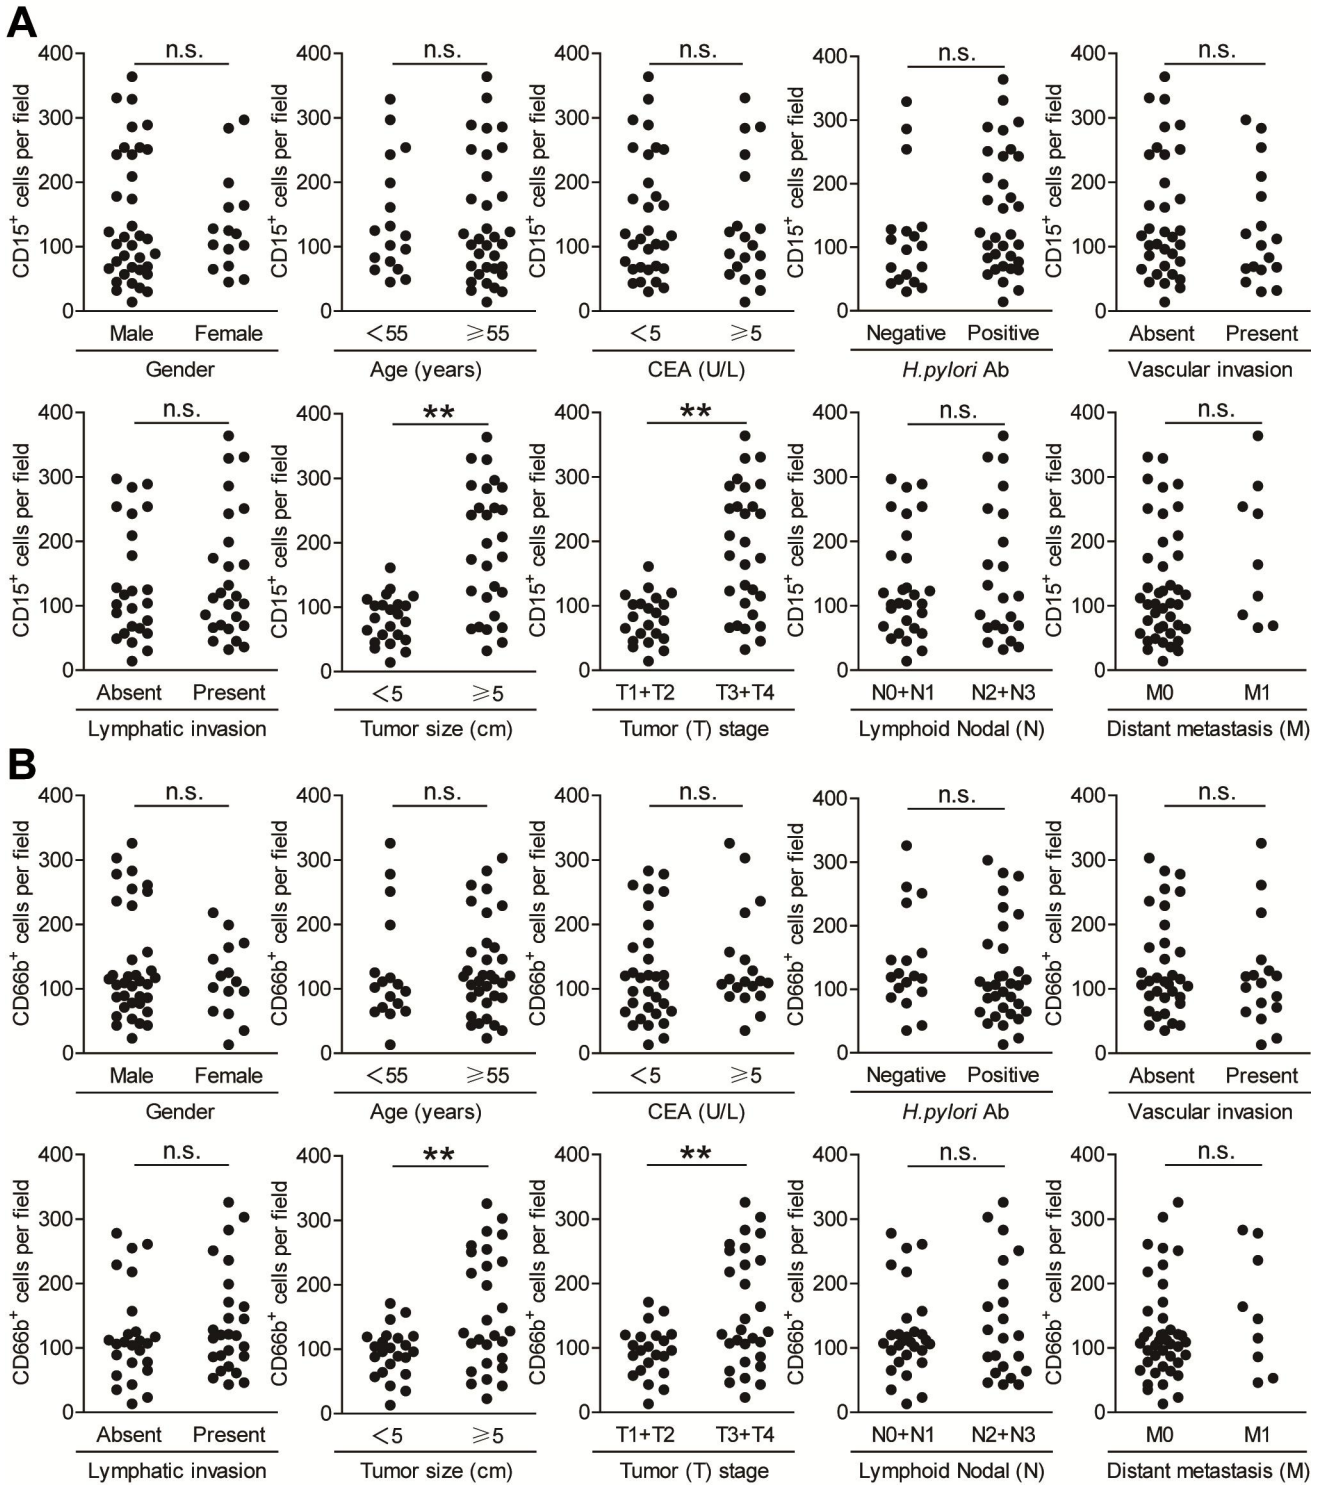

2

3 Supplementary Figure 1. CD15<sup>+</sup> neutrophil number (A) or CD66b<sup>+</sup> neutrophil number (B) and their potential  
 4 correlations with clinical parameters. Neutrophil number was analyzed for correlations with clinical  
 5 pathological parameters. \*\*,  $P < 0.01$ ; n.s.,  $P > 0.05$  for groups connected by horizontal lines. Each dot  
 6 represents 1 patient. CEA, carcinoembryonic antigen; *H. pylori* Ab, *Helicobacter pylori* antibody.

1 Supplementary Figure 2.

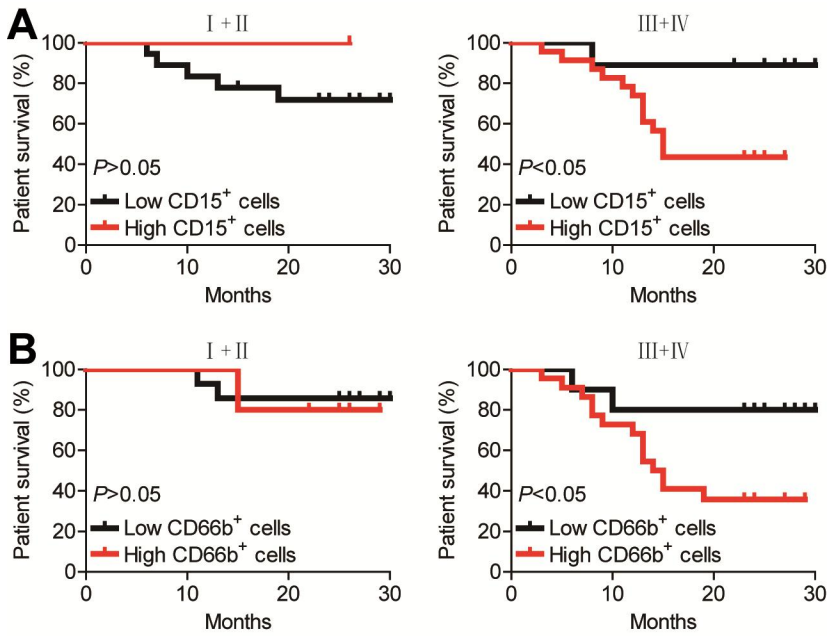

2

3 Supplementary Figure 2. Increased neutrophil accumulation in GC tumors predicts poor patient survival. (A)  
4 Kaplan-Meier plots for overall survival of the GC patients with TNM stage (I+II) or with TNM stage (III+IV)  
5 by median CD15<sup>+</sup> neutrophil number respectively. (B) Kaplan-Meier plots for overall survival of the GC  
6 patients with TNM stage (I+II) or with TNM stage (III+IV) by median CD66b<sup>+</sup> neutrophil number respectively.

1 Supplementary Figure 3.

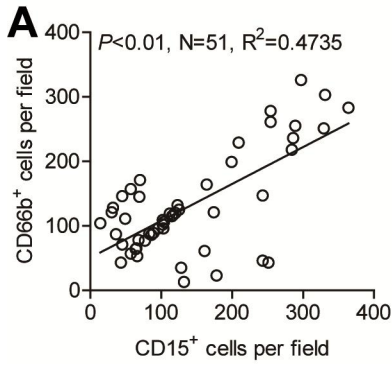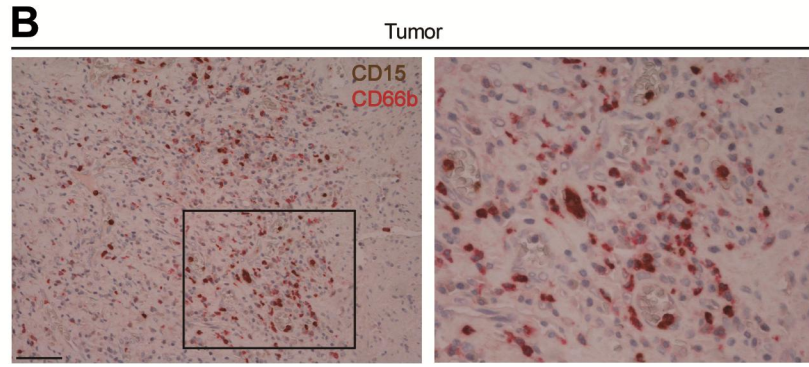

2

3 Supplementary Figure 3. CD15<sup>+</sup> neutrophils and CD66b<sup>+</sup> neutrophils are correlated in GC tumors. (A) The  
4 correlations between CD15<sup>+</sup> cells and CD66b<sup>+</sup> cells in human GC tumors were analyzed. Results are  
5 expressed as the number of CD15<sup>+</sup> cells per field and CD66b<sup>+</sup> cells per field in tumor tissues by  
6 immunohistochemical staining and counting. Each ring represents 1 patient. (B) Representative analysis of  
7 co-expression of CD15 (brown) and CD66b (red) on cells in tumor tissues of GC patients by  
8 immunohistochemical staining. Scale bars: 100 microns.

1 Supplementary Figure 4.

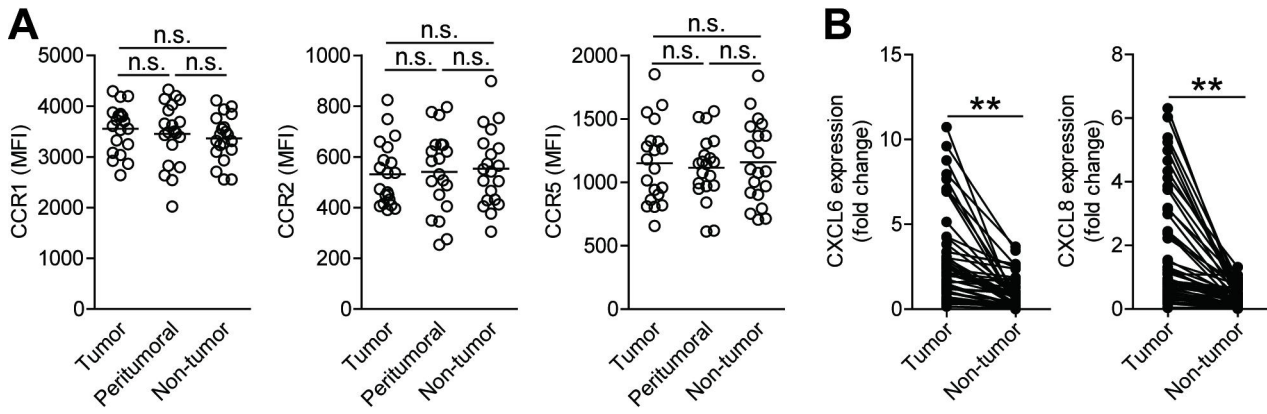

2

3 Supplementary Figure 4. Increased neutrophil accumulation is promoted by CXCL6/CXCL8-CXCR1-  
4 mediated chemotaxis. (A) Statistics analysis of the expression of CCR1, CCR2 and CCR5 on neutrophils in  
5 each samples of patients with GC (n=20). (B) CXCL6 and CXCL8 expression between autologous tumor  
6 and non-tumor tissues (n=51) was analyzed. \*,  $P<0.05$ ; \*\*,  $P<0.01$ , n.s.,  $P>0.05$  for groups connected by  
7 horizontal lines.

1 Supplementary Figure 5.

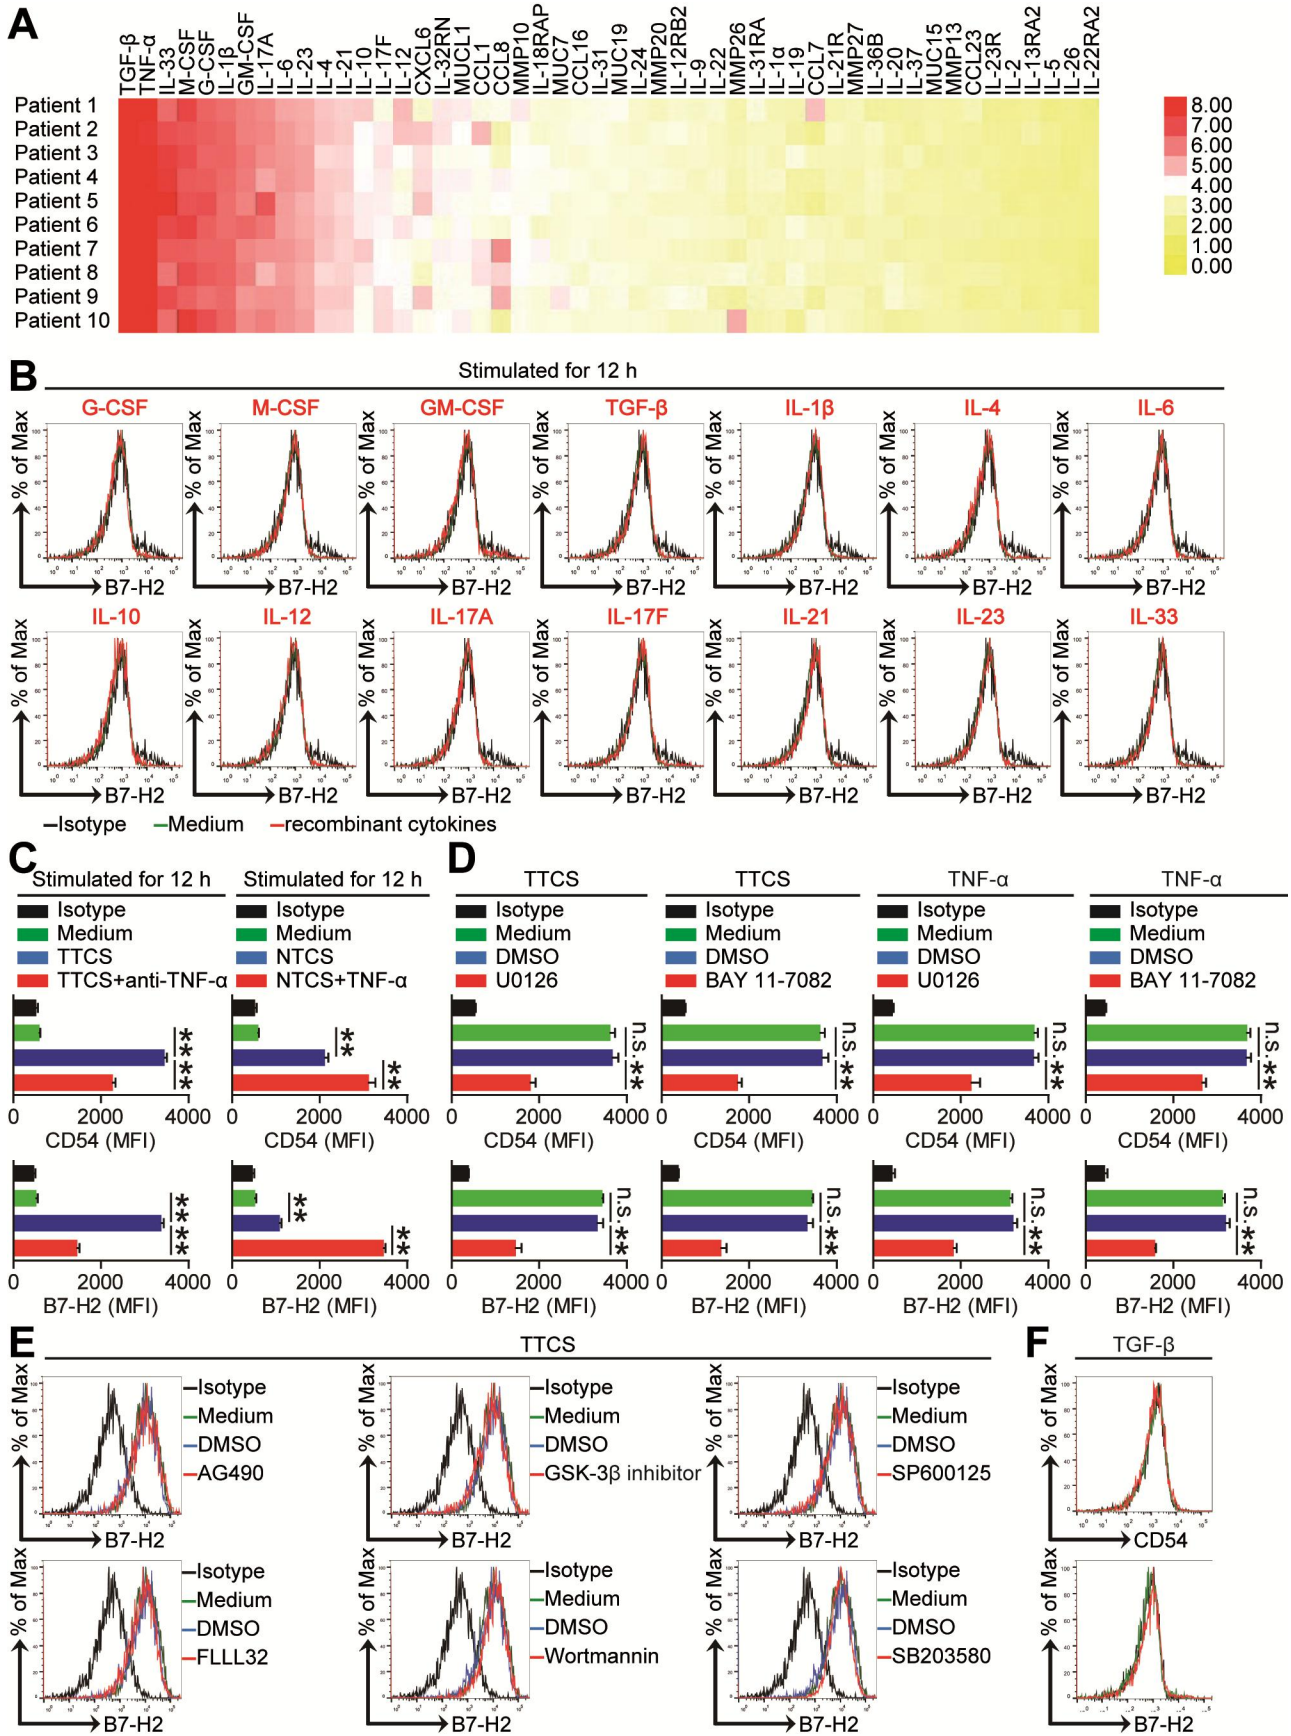

2

3 Supplementary Figure 5. Tumor-derived TNF- $\alpha$  activates neutrophils and induces B7-H2 expression on  
 4 neutrophils via ERK-NF- $\kappa$ B pathway. (A) Clustering of microarray data for the expression of 50 pro-  
 5 inflammatory cytokine genes in human tumor tissues from 10 GC patients. (B) Expression of B7-H2 on

1 neutrophils exposed to G-CSF, M-CSF, GM-CSF, TGF- $\beta$ , IL-1 $\beta$ , IL-4, IL-6, IL-10, IL-12, IL-17A, IL-17F, IL-  
2 21, IL-23, IL-33 (100 ng/ml) for 12 hours. black, isotype control. (C) Statistical analysis of the expression of  
3 CD54 and B7-H2 on neutrophils exposed to TTCS with anti-TNF- $\alpha$  antibody or NTCS with TNF- $\alpha$  for 12  
4 hours (n=3). black, isotype control. (D) Statistical analysis of the expression of CD54 and B7-H2 on  
5 neutrophils exposed to TTCS or TNF- $\alpha$  with or without U0126 (an ERK inhibitor) or BAY 11-7082 (an I $\kappa$ B $\alpha$   
6 inhibitor) for 12 hours (n=3). black, isotype control. (E) Expression of B7-H2 on neutrophils exposed to 50%  
7 TTCS with or without AG490 (a JAK inhibitor), SP600125 (a JNK inhibitor), FLLL32 (an STAT3 inhibitor),  
8 Wortmannin (a PI3K inhibitor), SB203580 (an MAPK inhibitor), or GSK-3 $\beta$  inhibitor for 12 hours. black,  
9 isotype control. (F) Expression of B7-H2 and CD54 on neutrophils exposed to TGF- $\beta$  (100 ng/ml) for 12  
10 hours. black, isotype control.

1 Supplementary Figure 6.

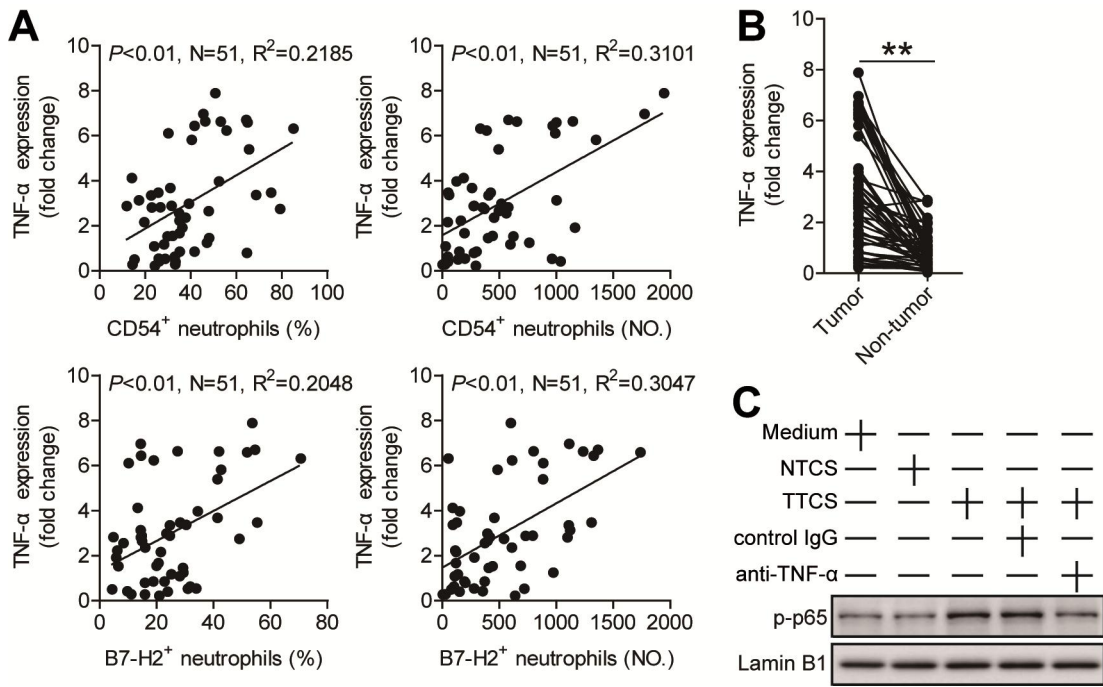

2

3 Supplementary Figure 6. Tumor-derived TNF-α activates neutrophils and induces B7-H2 expression. (A)

4 The correlations between TNF-α and CD54<sup>+</sup> neutrophils or B7-H2<sup>+</sup> neutrophils in human tumors were

5 analyzed. Results are expressed as percentage of CD54<sup>+</sup> neutrophils and B7-H2<sup>+</sup> neutrophils in total

6 neutrophils or the number of CD54<sup>+</sup> neutrophils and B7-H2<sup>+</sup> neutrophils per million total cells and TNF-α

7 expression in tumor tissues. (B) TNF-α expression between autologous tumor and non-tumor tissues (n=51)

8 was analyzed. (C) The p-p65 proteins in nucleus of neutrophils exposed to autologous TTCS, NTCS, or

9 TTCS with anti-TNF-α antibody or control IgG for 12 hours were analyzed by western blot. Each dot in

10 panels A or B represents 1 patient.  $**$ ,  $P < 0.01$  for groups connected by horizontal lines.

1 Supplementary Figure 7.

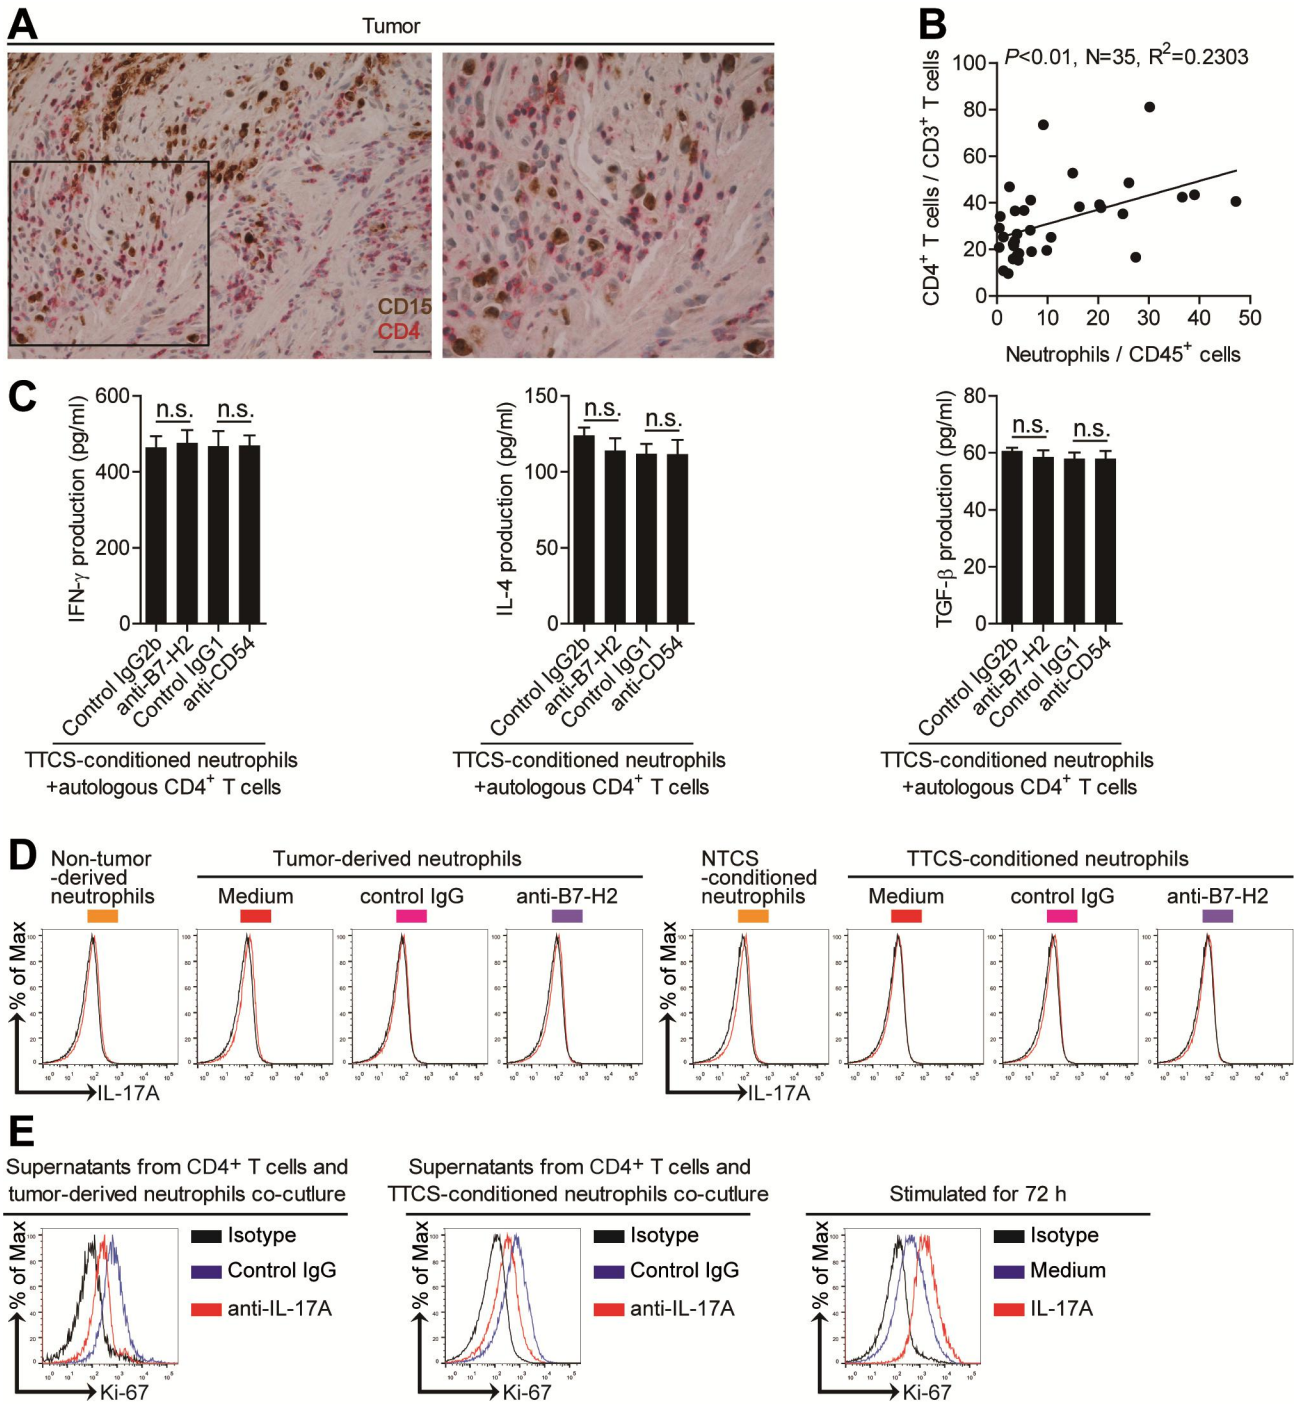

2  
3 **Supplementary Figure 7. Tumor-infiltrating and tumor-conditioned neutrophils induce protumorigenic IL-**  
4 **17A-producing Th subset polarization through a B7-H2-dependent manner, which promotes tumor growth**  
5 **and GC progression *in vivo*. (A) Representative analysis of CD15<sup>+</sup> neutrophil (brown) and CD4<sup>+</sup> T cell (red)**  
6 **interactions in tumor tissues of GC patients by immunohistochemical staining. Scale bars: 100 microns. (B)**  
7 **The correlations between neutrophils and CD4<sup>+</sup> T cells in human GC tumors were analyzed. Results are**  
8 **expressed as the percentage of neutrophils in CD45<sup>+</sup> cells and the percentage of CD4<sup>+</sup> T cells in CD3<sup>+</sup> T**  
9 **cells in tumor tissues. (C) CFSE-labeled peripheral CD4<sup>+</sup> T cells of donors were co-cultured for 4 days with**  
10 **autologous TTCS-conditioned neutrophils with or without anti-B7-H2 or anti-CD54 antibody. Statistical**



1 analysis of the production of IFN- $\gamma$ , IL-4 and TGF- $\beta$  was shown (n=3). (D) CFSE-labeled peripheral CD4<sup>+</sup> T  
2 cells of GC patients or of donors were co-cultured for 4 days with autologous neutrophils from non-tumor or  
3 tumor tissues or with autologous NTCS-conditioned neutrophils or TTCS-conditioned neutrophils with or  
4 without anti-B7-H2 antibody. Representative data of IL-17A expression in these neutrophils was shown. (E)  
5 GC cells were stimulated with the culture supernatants from autologous peripheral CD4<sup>+</sup> T cells and tumor-  
6 derived neutrophils plus control IgG or IL-17A neutralizing antibody, or the culture supernatants from  
7 autologous peripheral CD4<sup>+</sup> T cells and TTCS-conditioned neutrophils plus control IgG or IL-17A  
8 neutralizing antibody, or exposed to IL-17A as described in Methods. The proliferation of GC cells was  
9 analyzed by using Ki-67 staining. n.s.,  $P>0.05$  for groups connected by horizontal lines.

1 Supplementary Figure 8.

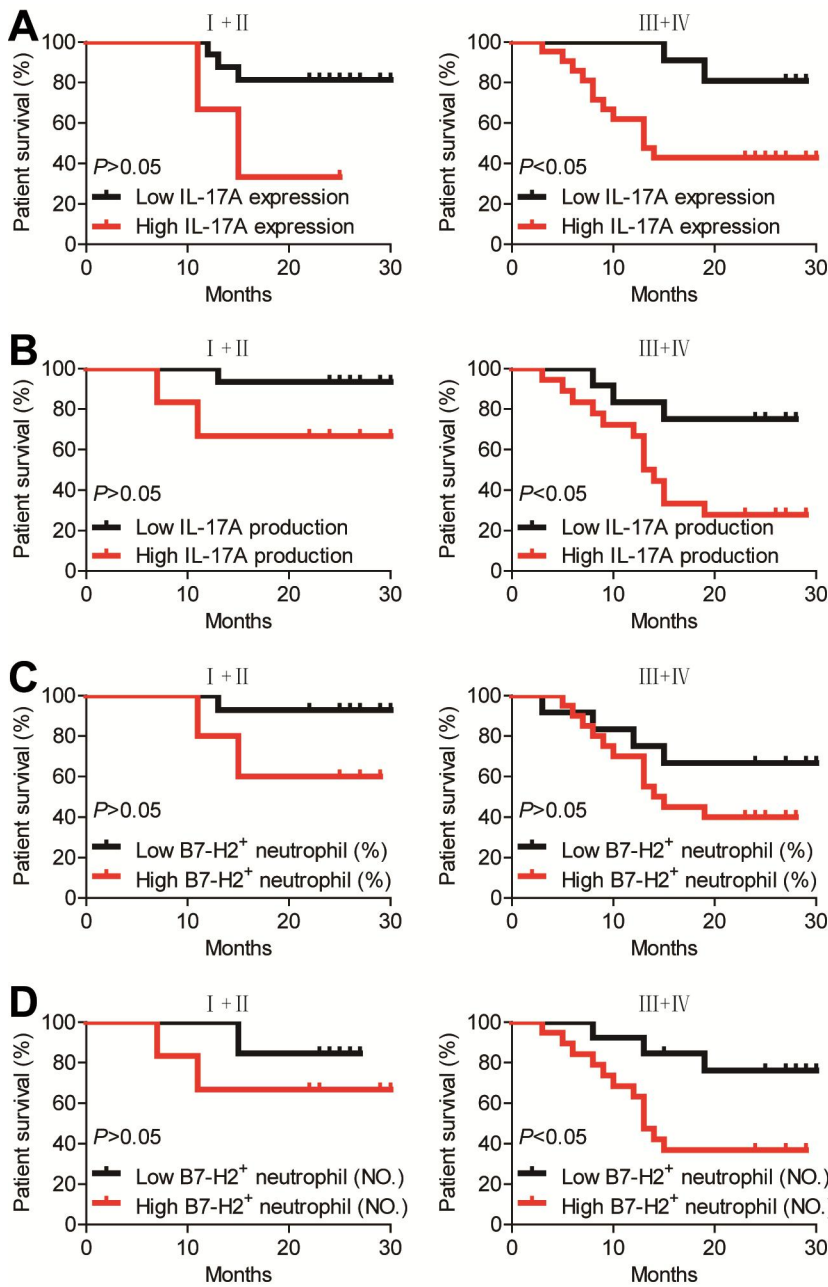

2

3 **Supplementary Figure 8. B7-H2<sup>+</sup> neutrophils and IL-17A correlate with poor survival in patients with GC. (A)**  
4 **Kaplan-Meier plots for overall survival of the GC patients with TNM stage (I+II) or with TNM stage (III+IV)**  
5 **by median IL-17A expression respectively. (B) Kaplan-Meier plots for overall survival of the GC patients**  
6 **with TNM stage (I+II) or with TNM stage (III+IV) by median IL-17A production respectively. (C) Kaplan-**  
7 **Meier plots for overall survival of the GC patients with TNM stage (I+II) or with TNM stage (III+IV) by**  
8 **median B7-H2<sup>+</sup> neutrophil percentage respectively. (D) Kaplan-Meier plots for overall survival of the GC**  
9 **patients with TNM stage (I+II) or with TNM stage (III+IV) by median B7-H2<sup>+</sup> neutrophil number respectively.**

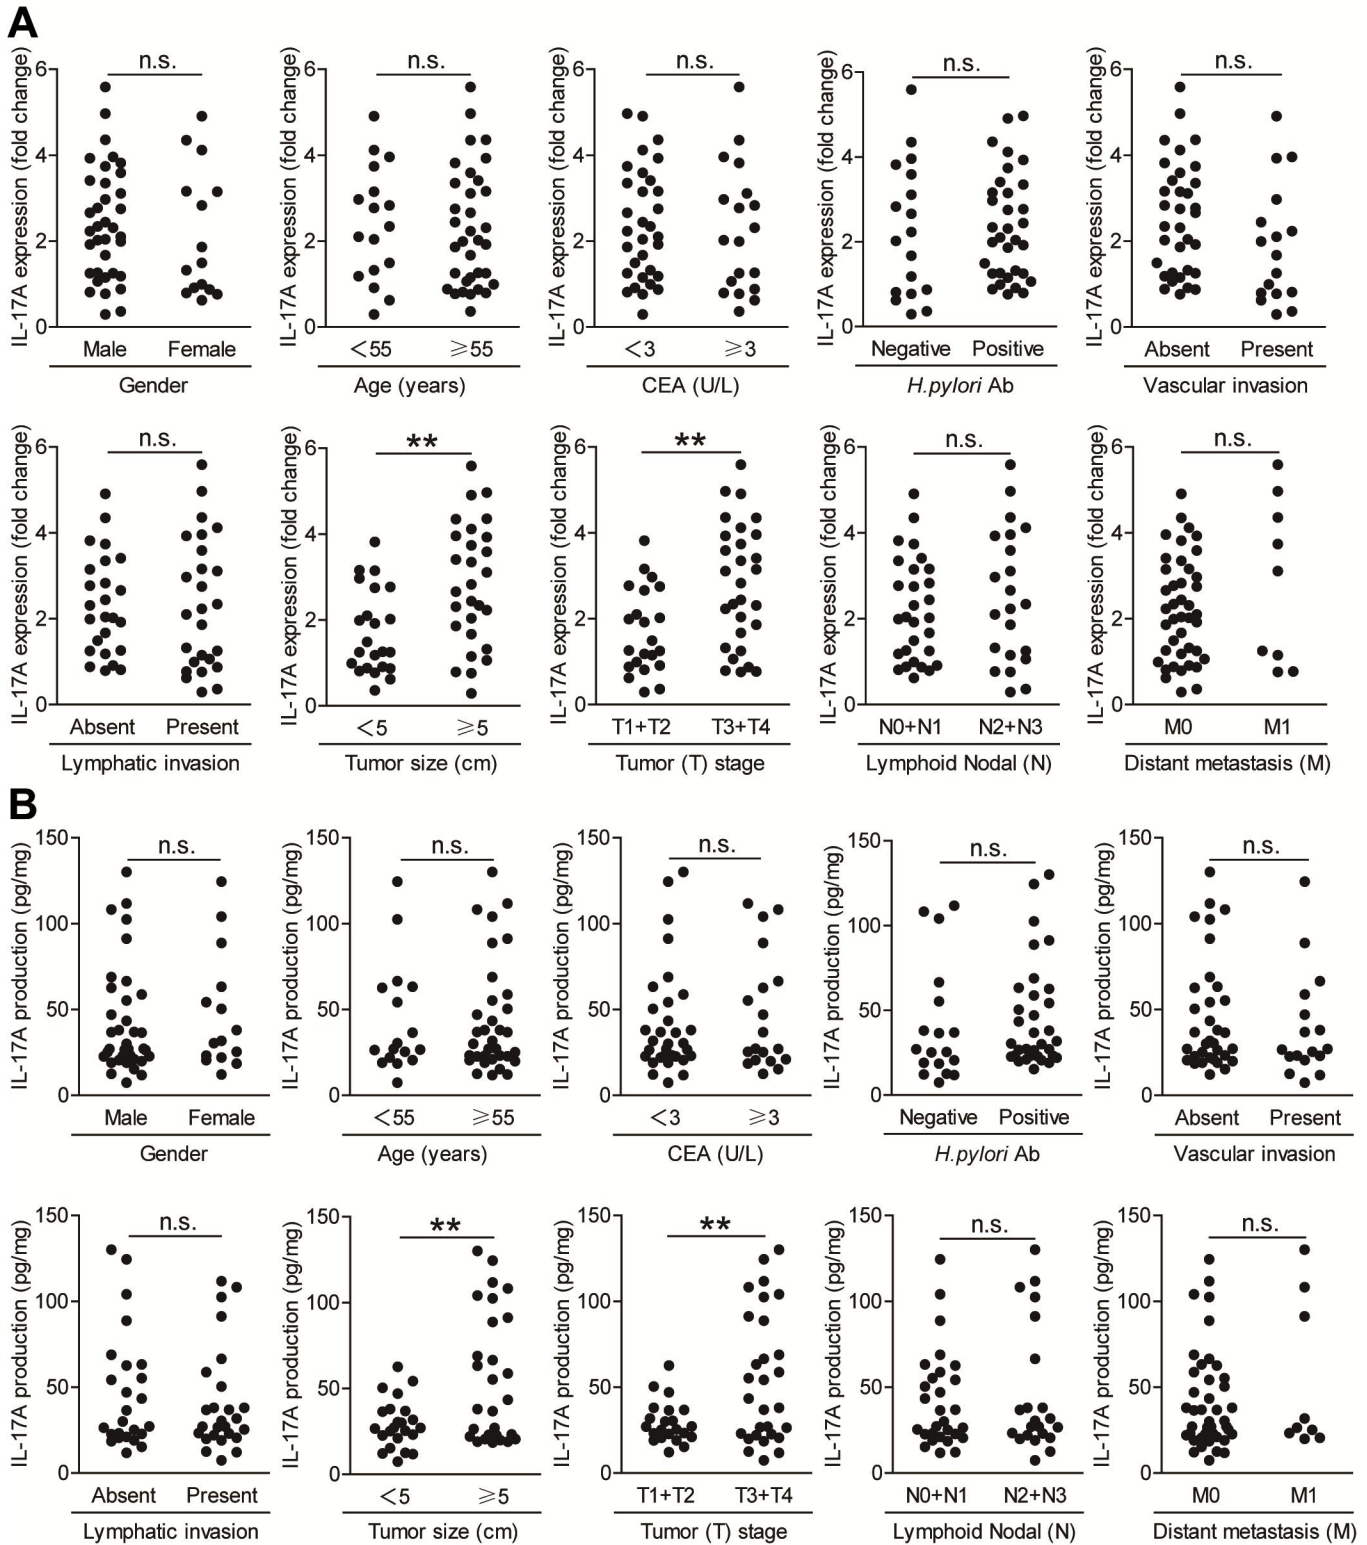

2

3 Supplementary Figure 9. IL-17A and its potential correlations with clinical parameters. IL-17A expression (A)

4 or IL-17A production (B) was analyzed for correlations with clinical pathological parameters. \*\*,  $P < 0.01$ ; n.s.,

5  $P > 0.05$  for groups connected by horizontal lines. Each dot represents 1 patient. CEA, carcinoembryonic

6 antigen; *H.pylori* Ab, *Helicobacter pylori* antibody.

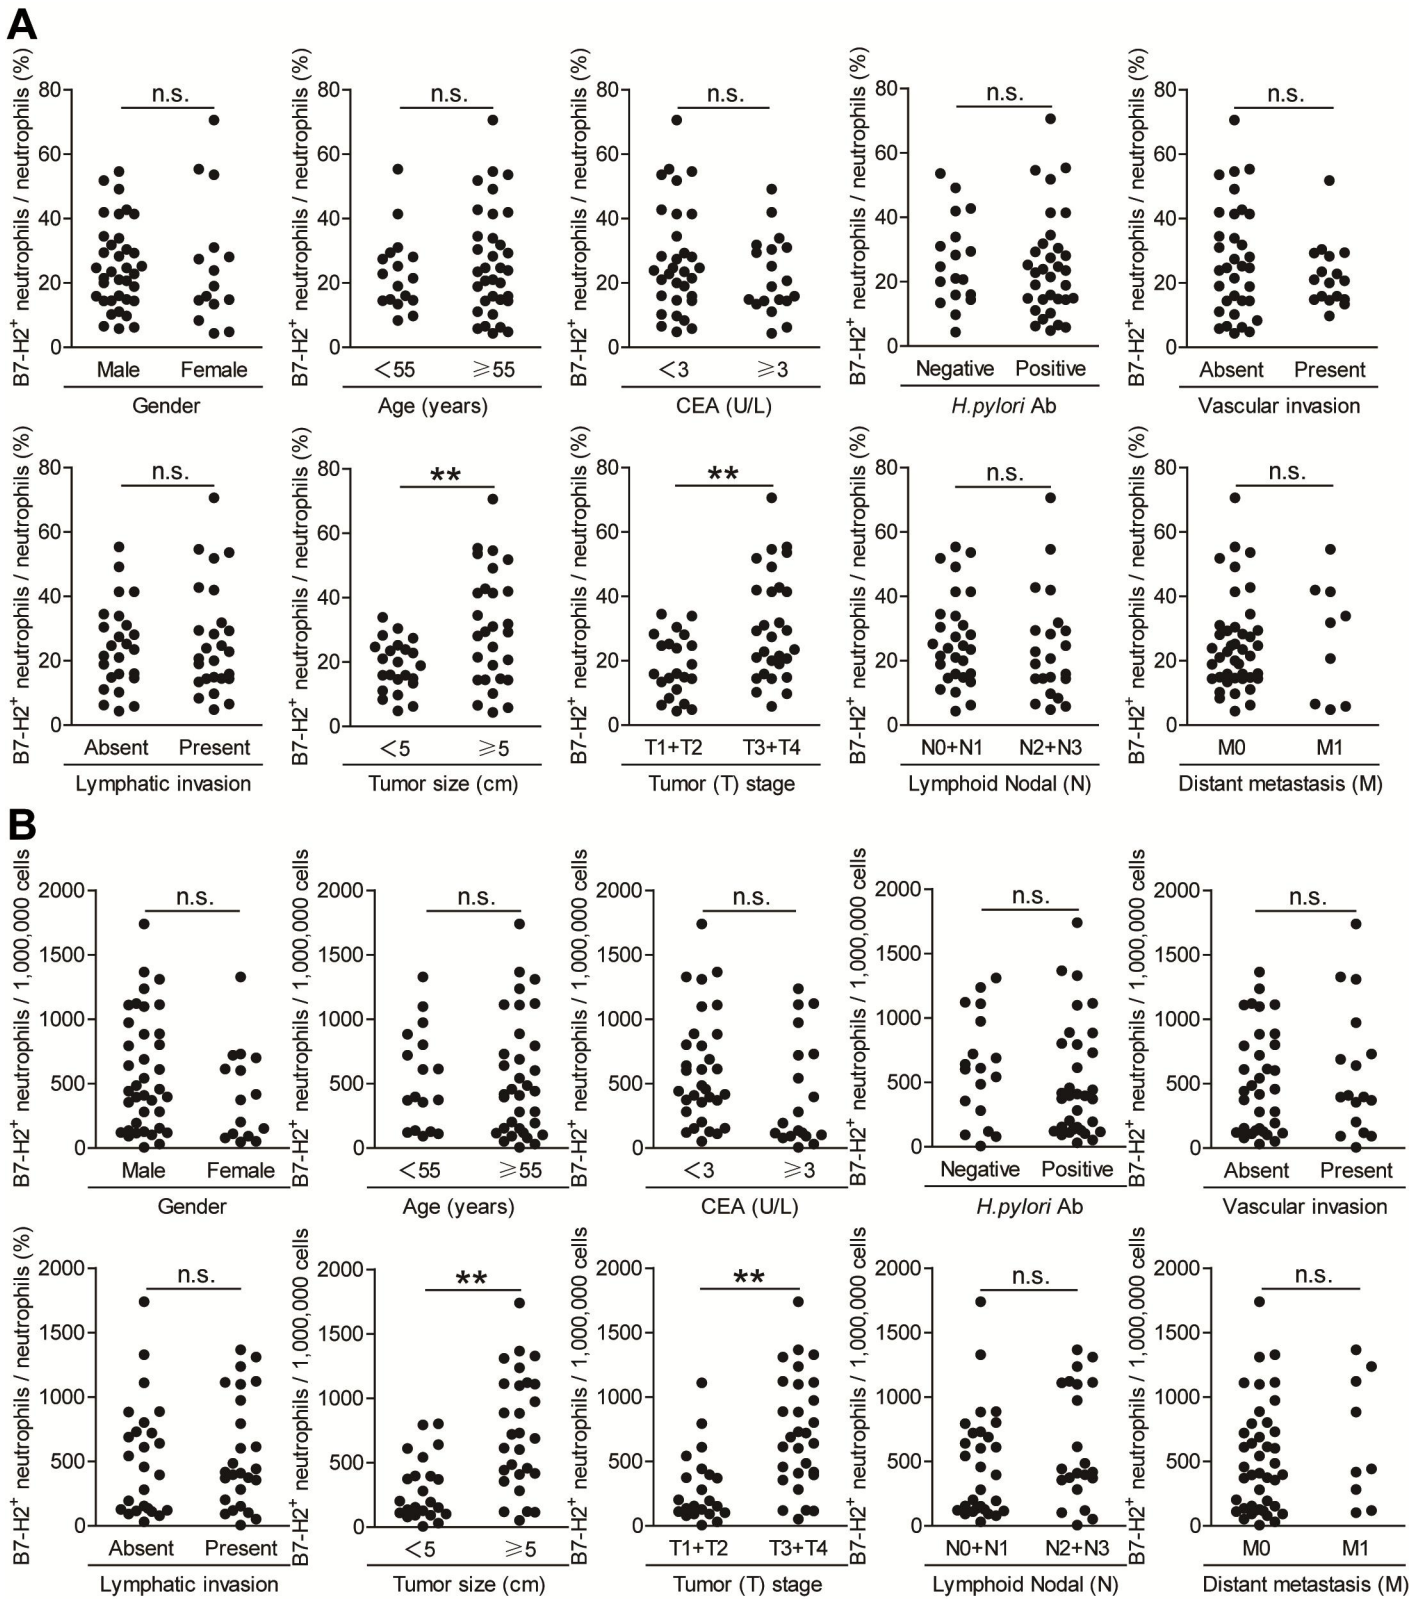

2

3 Supplementary Figure 10. B7-H2<sup>+</sup> neutrophils and their potential correlations with clinical parameters. B7-  
 4 H2<sup>+</sup> neutrophil percentage (A) or B7-H2<sup>+</sup> neutrophil number (B) was analyzed for correlations with clinical  
 5 pathological parameters. \*\*,  $P < 0.01$ ; n.s.,  $P > 0.05$  for groups connected by horizontal lines. Each dot  
 6 represents 1 patient. CEA, carcinoembryonic antigen; *H.pylori* Ab, *Helicobacter pylori* antibody.
